# Supplementary figures and images for: A photoelectron spectroscopic investigation of aspirin, paracetamol and ibuprofen in the gas phase
Source: Royal Society of Chemistry journal article supplement (doi:10.1039/d2cp05810c), 2023-01-01

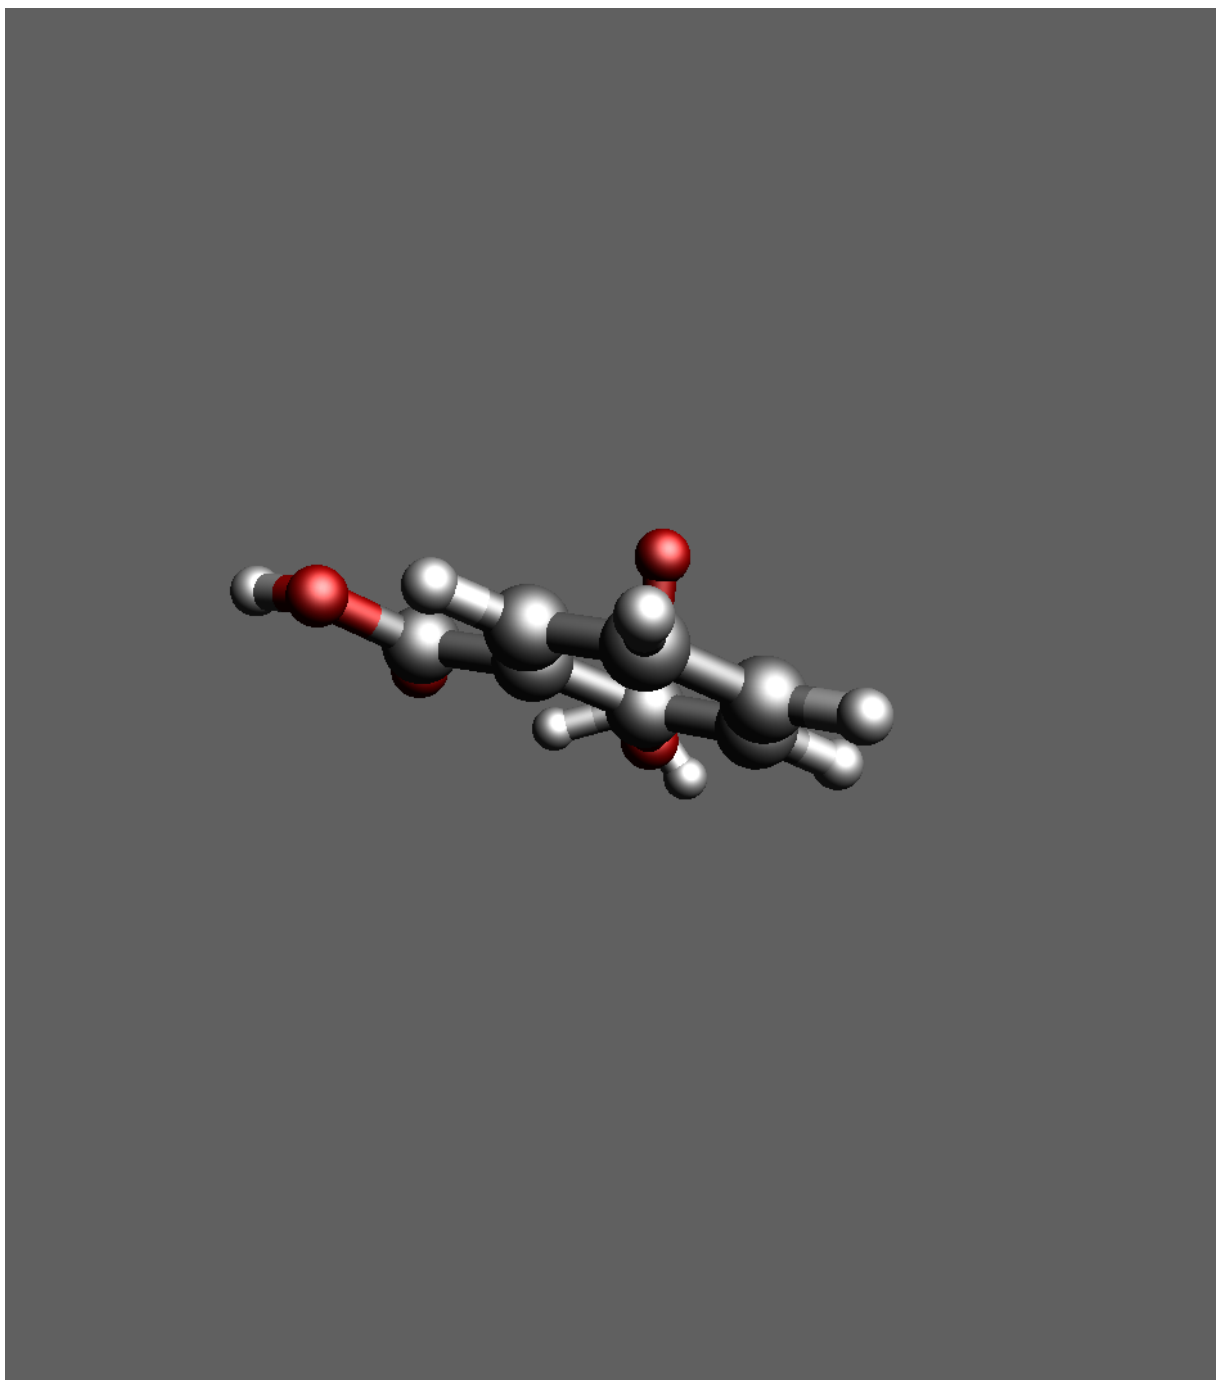

Aspirin #1

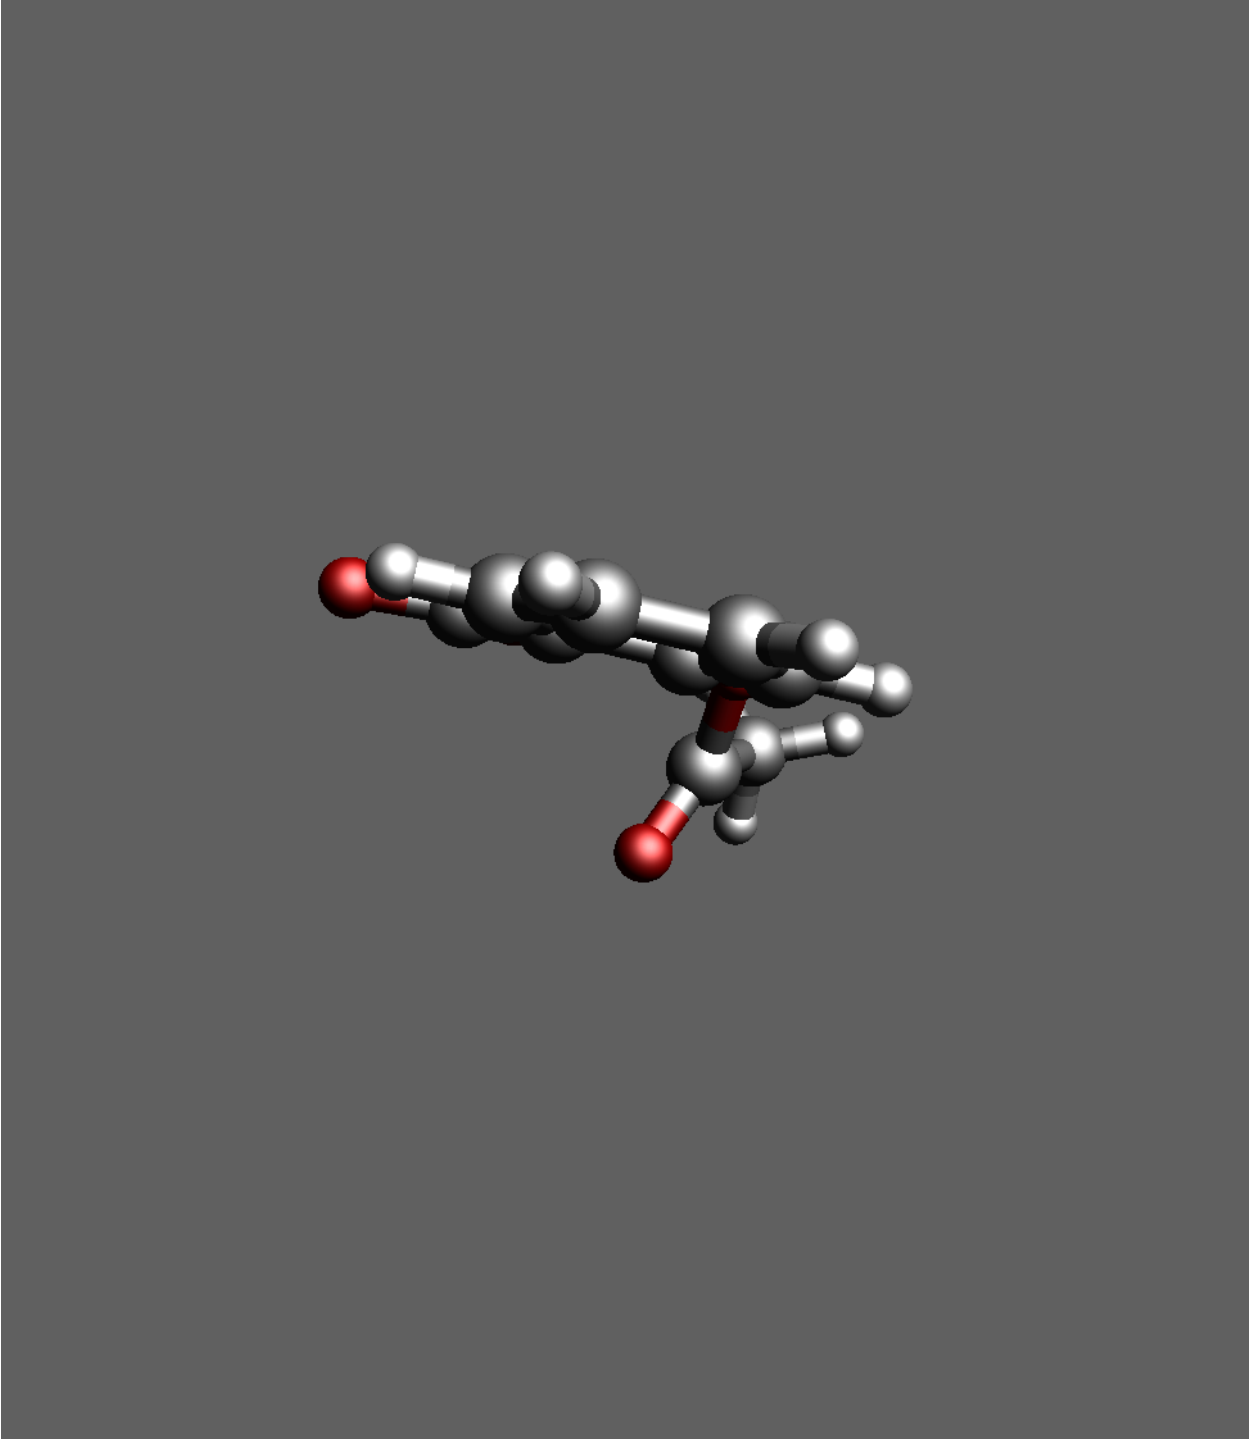

Aspirin #2

A

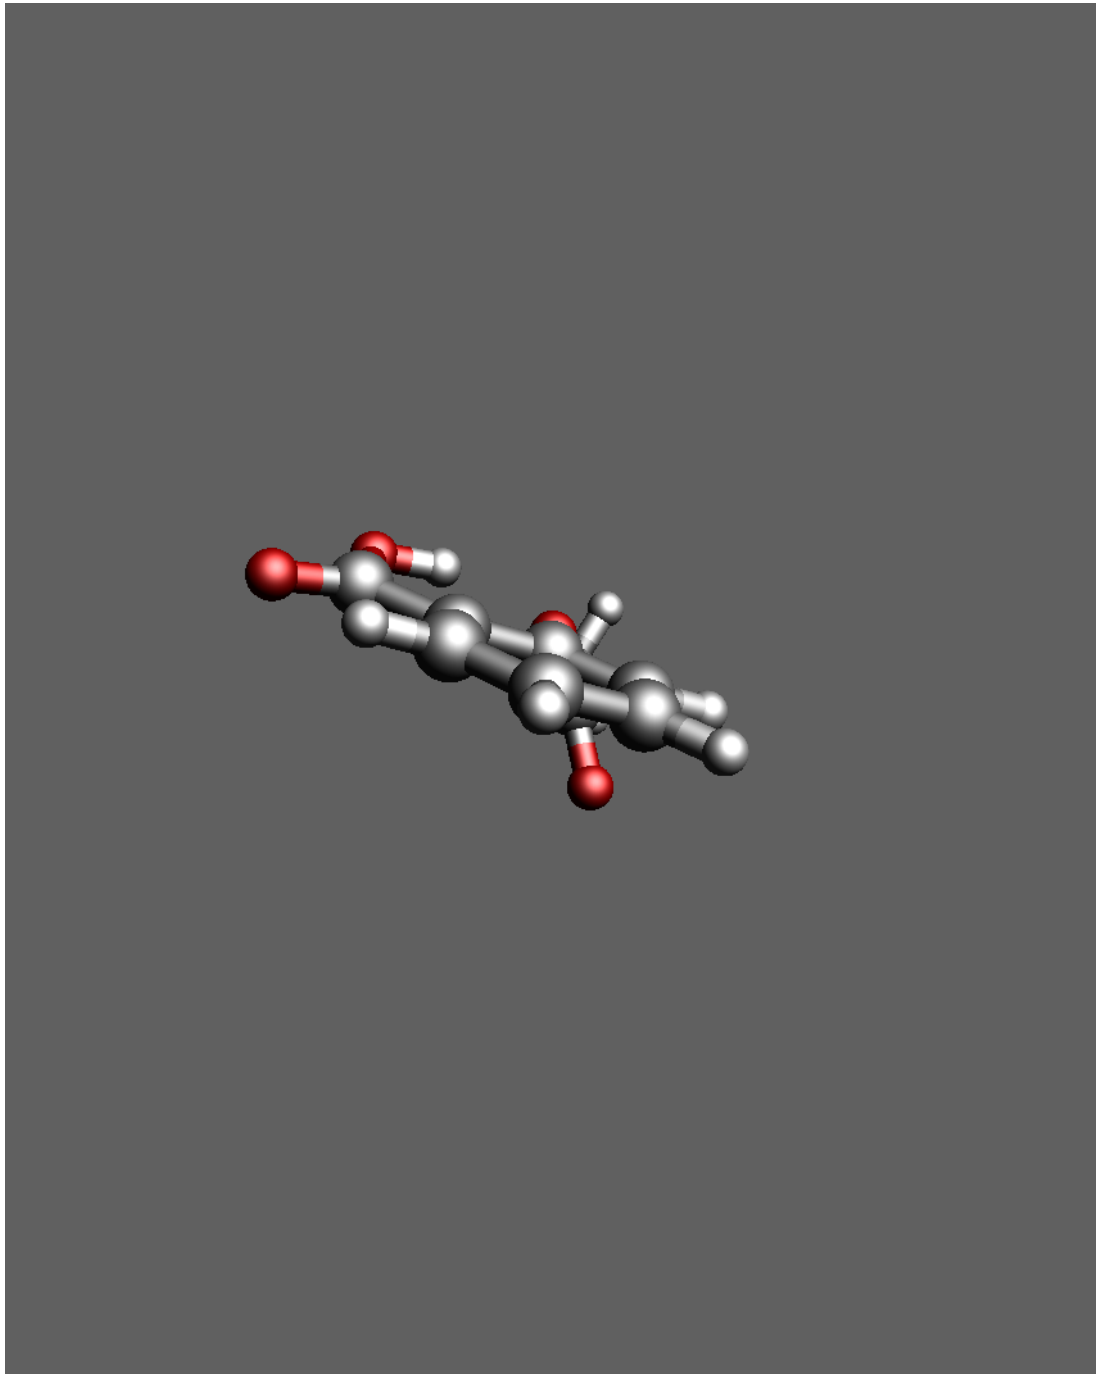

Aspirin #3

Supplement: d2cp05810c1.pdf [file d2cp05810c1.pdf]

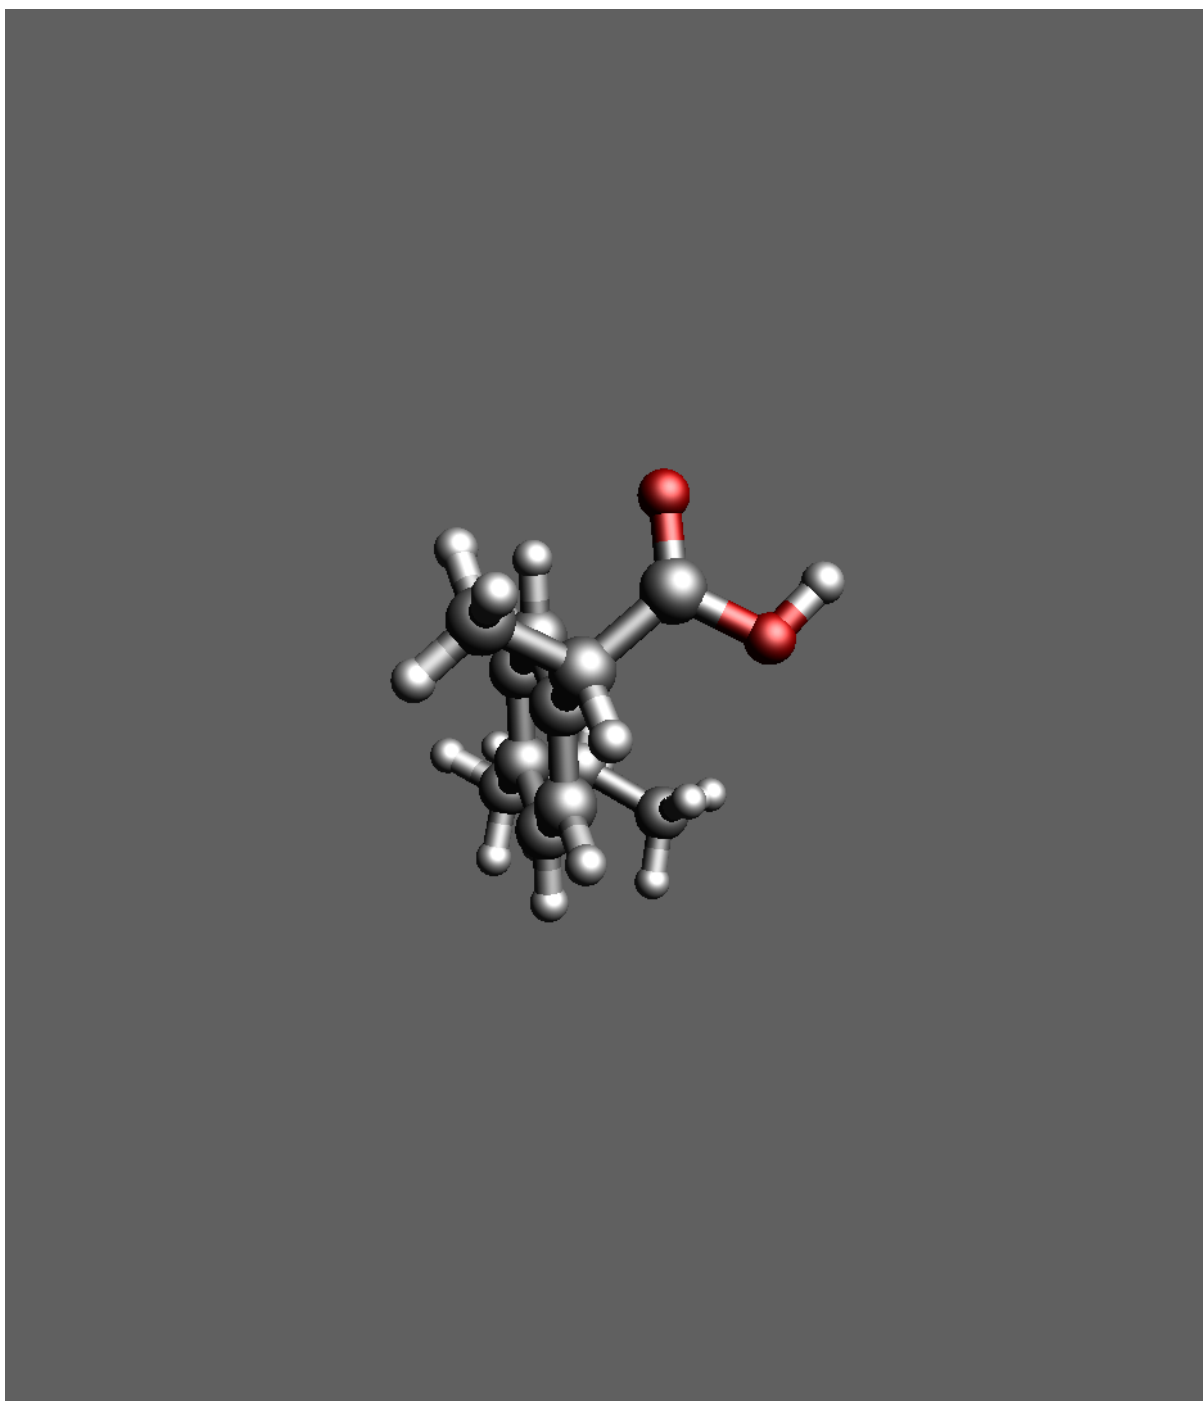

Ibuprofen #1

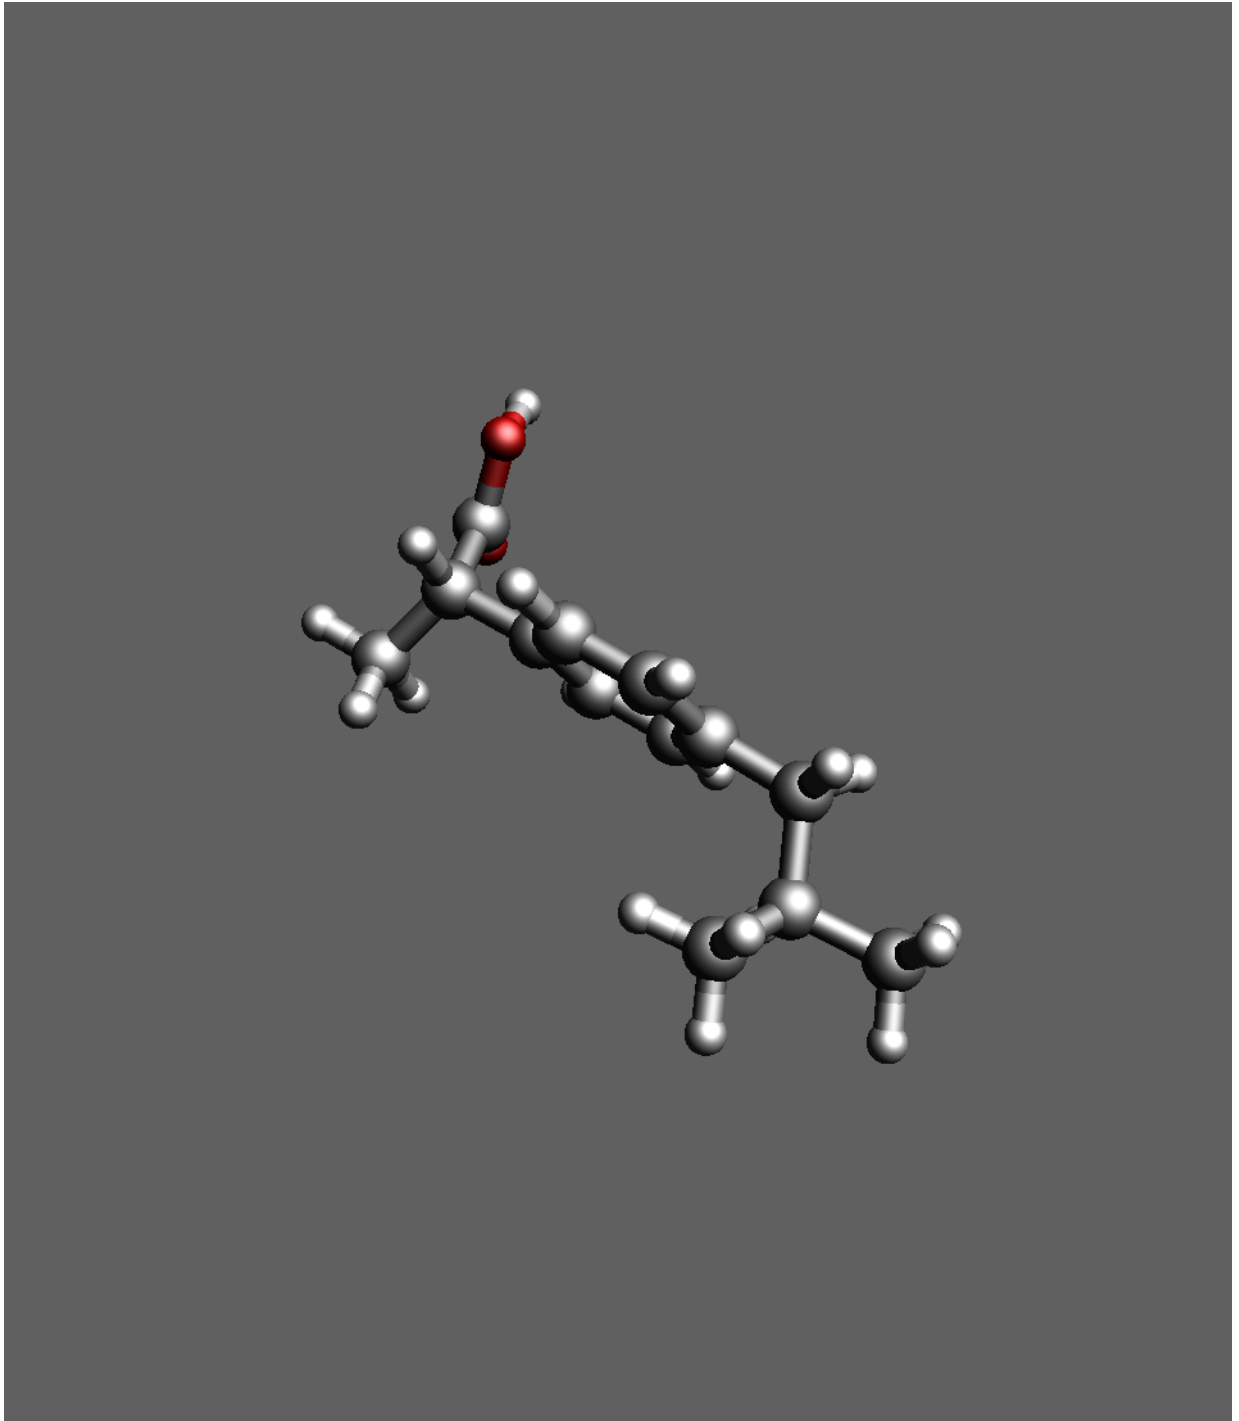

Ibuprofen #2

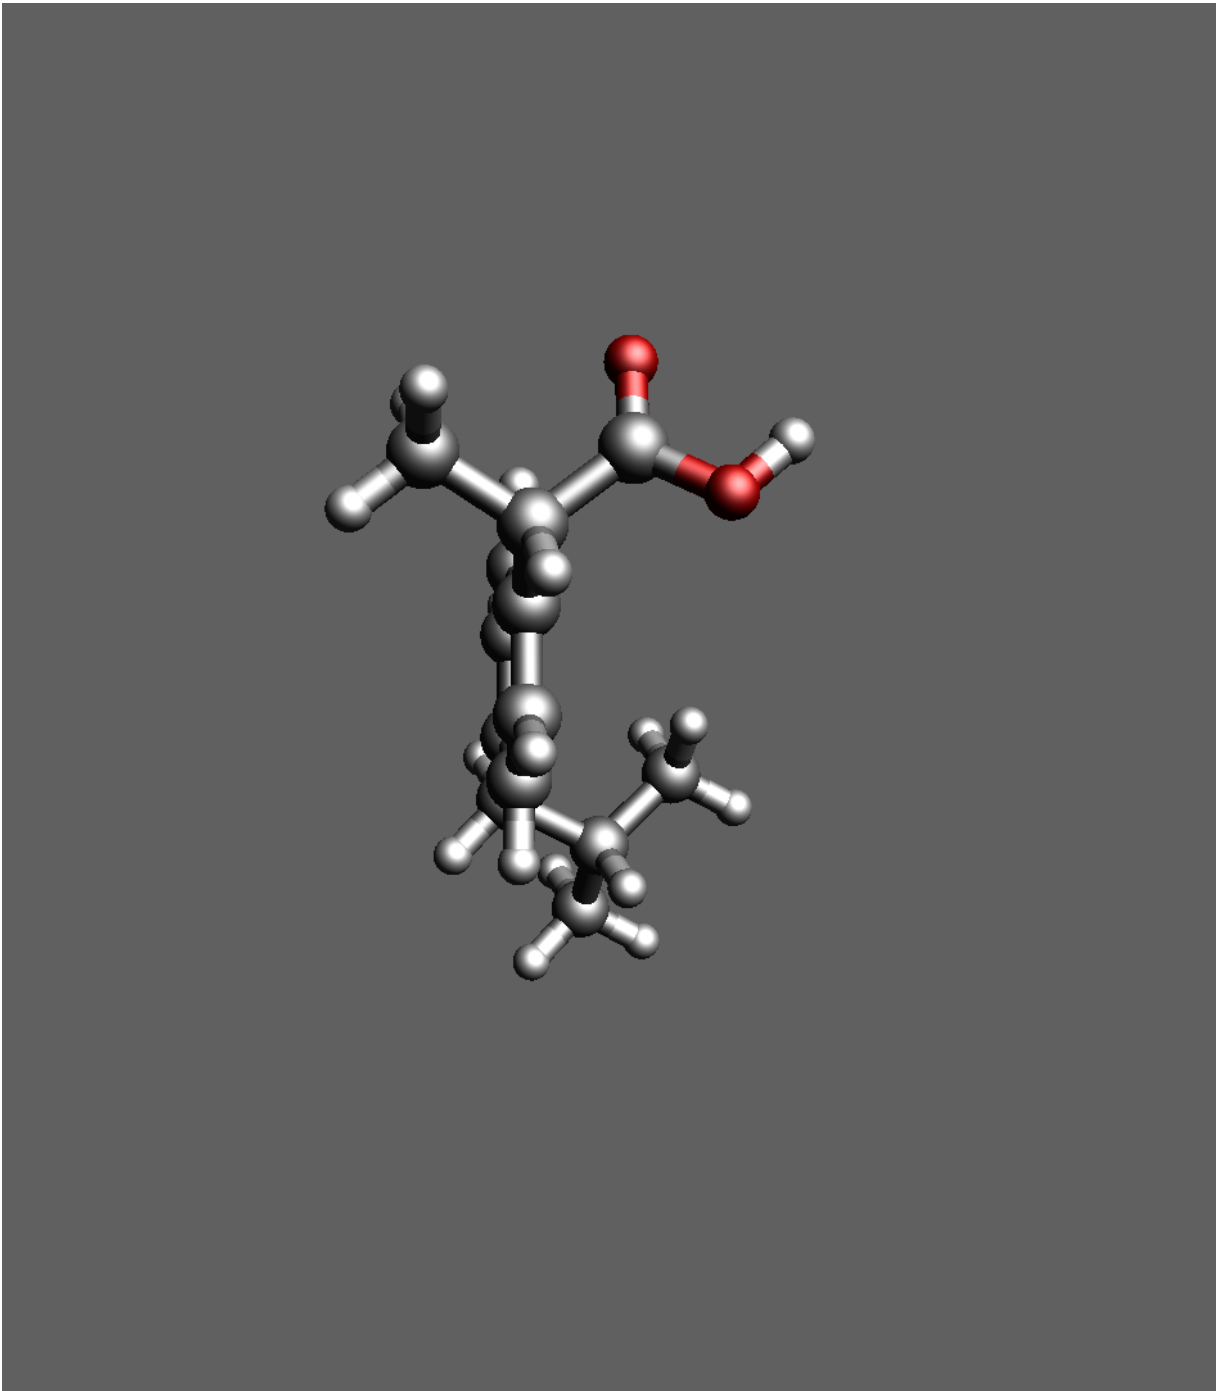

Ibuprofen #3

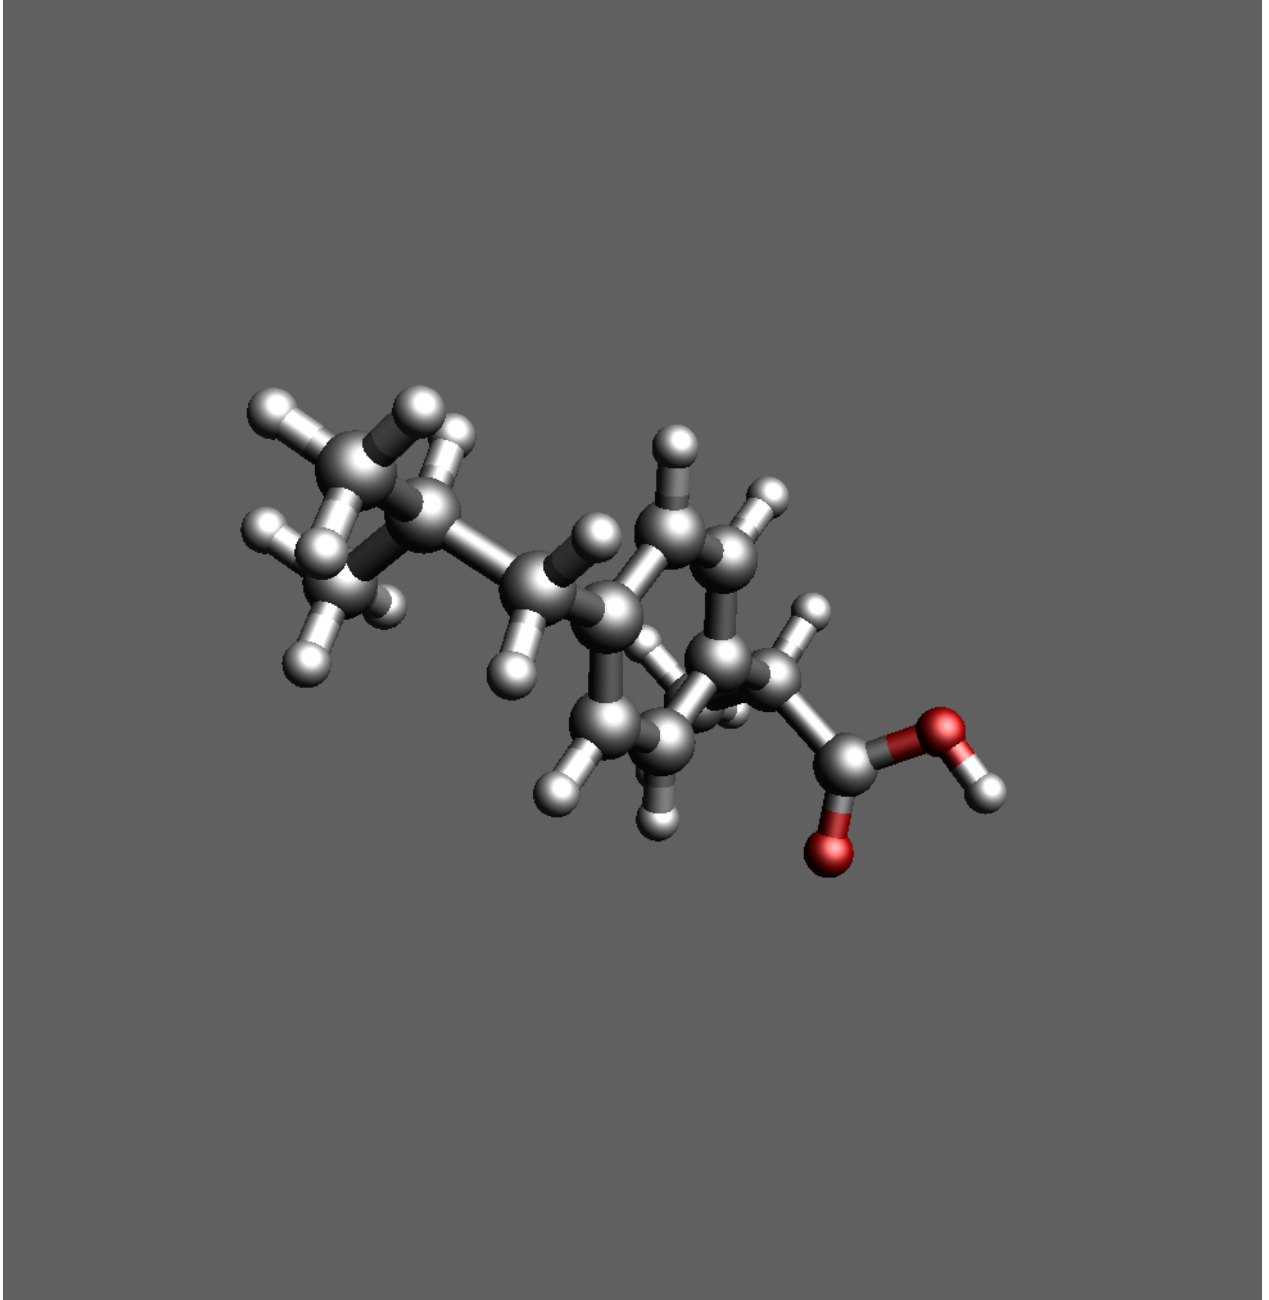

Ibuprofen #4

Supplement: d2cp05810c3.pdf [file d2cp05810c3.pdf]

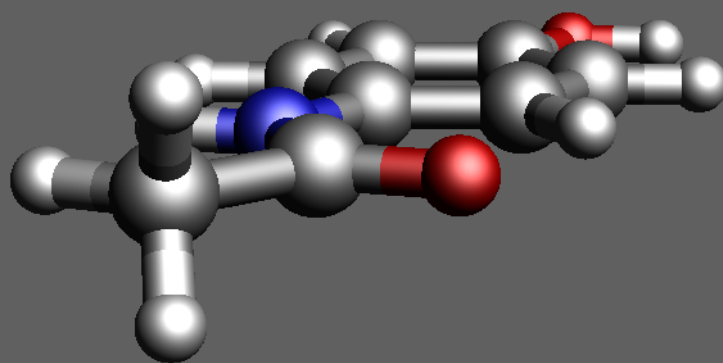

Paracetamol #1

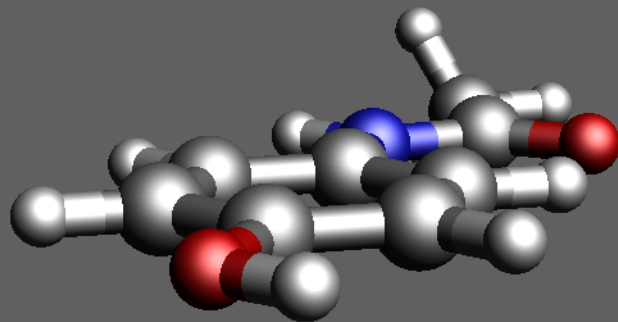

Paracetamol #2

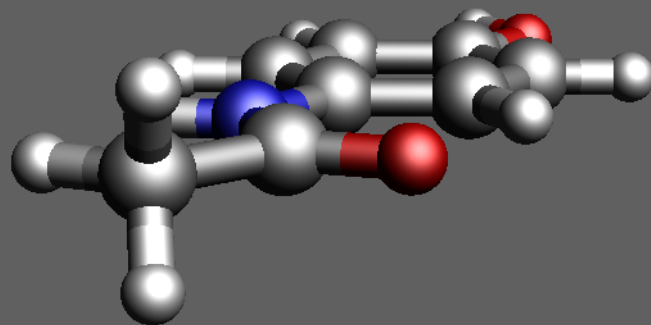

Paracetamol #3

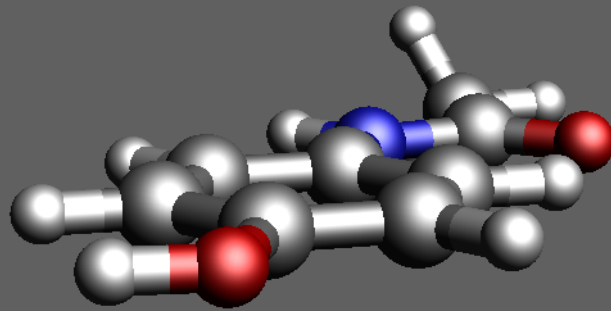

Paracetamol #4

Supplement: d2cp05810c4.pdf [file d2cp05810c4.pdf]
